# Supplementary material
Source: Springer Nature journal article supplement (https://www.springermedizin.de/resource/supplementary/13017_2009_139_MOESM6_ESM.pdf/9635552)

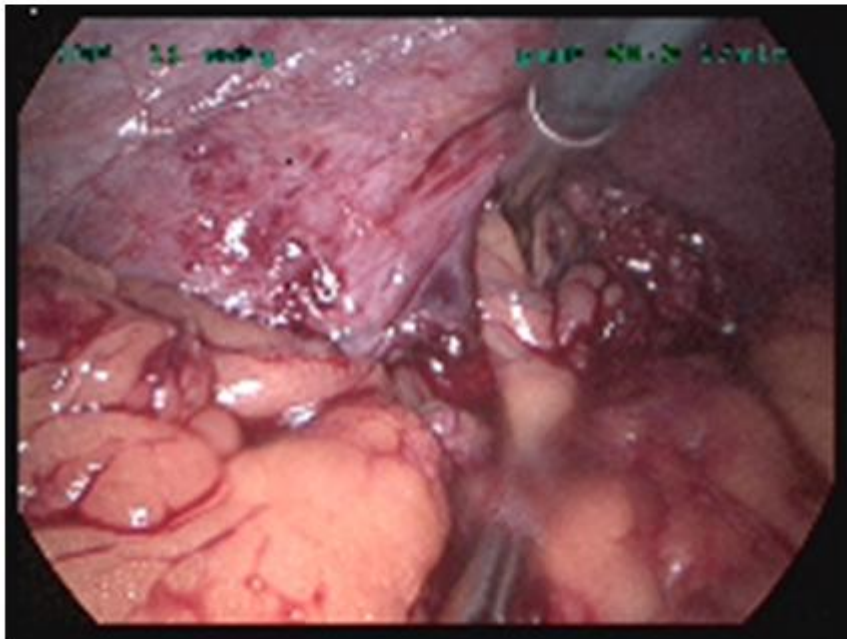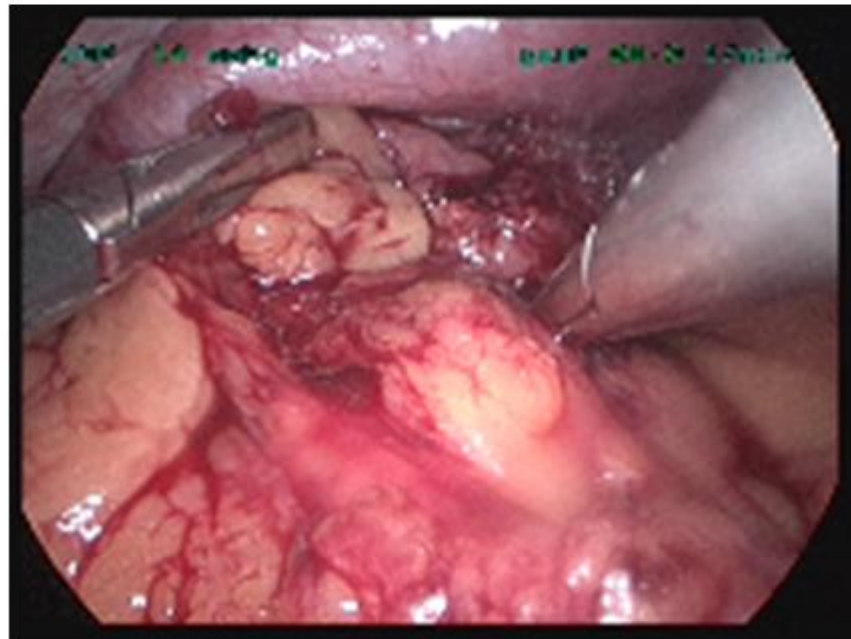

Supplement: MOESM6 [file 9635552]
